# Supplementary material for: Methylphenidate and Risk of Serious Cardiovascular Events in Adults
Source: Atypon-hosted journal article supplement (doi:10.1176/appi.ajp.2011.11010125), 2012-02-01
Supplement: appi.ajp.2011.11010125.ds001.pdf [file appi.ajp.2011.11010125.ds001.pdf]

**TABLE S1. Baseline Variables Included in Propensity Scores<sup>a</sup>**

| <b>Demographic Variables</b>        | <b>Diagnosis (Continued)</b>           | <b>Drugs</b>                  |
|-------------------------------------|----------------------------------------|-------------------------------|
| Age                                 | Encopresis                             | ACE inhibitor                 |
| Gender                              | Enuresis                               | Aldosterone inhibitor         |
| Race <sup>b</sup>                   | Epilepsy                               | Alpha-1 blocker               |
| State                               | Infantile cerebral palsy               | Anorexiant agent              |
| Data source                         | HIV                                    | Antiadrenergic agent          |
| Calendar year                       | Heart failure                          | Antiarrhythmic agent          |
| Nursing home residence <sup>b</sup> | Hypercholesterolemia                   | Antidiabetic agent            |
| An inpatient or outpatient claim    | Hypertension                           | Antihyperlipidemic agent      |
| <b>Diagnosis</b>                    | Hypothyroidism                         | Antipsychotic dose equivalent |
| Acquired or hereditary anemia       | Ischemic heart disease                 | Antiseizure agent             |
| Adjustment disorder                 | Kidney disease                         | Anxiolytic agent              |
| Alcohol use or abuse                | Learning disorder                      | Aspirin                       |
| Anxiety                             | Liver disease                          | Beta-blocker                  |
| Arrhythmia                          | Marfan syndrome                        | Bronchodilator                |
| Asthma                              | Myocardial infarction                  | Bupropion                     |
| Autism                              | Muscular dystrophy                     | COX-2 inhibitor               |
| Bipolar disorder                    | Narcolepsy                             | Calcium channel blocker       |
| COPD                                | Obesity                                | Immunosuppressive agent       |
| Bronchitis                          | Obsessive-compulsive disorder          | Inhaled corticosteroid        |
| Cancer                              | Oppositional defiant disorder          | Inotropic agent               |
| Capillaries disease                 | Osteoarthritis                         | Loop diuretic                 |
| Cardiomyopathy                      | Osteogenesis imperfecta                | NSAID                         |
| Cerebral degeneration               | Other congenital malformations         | Nitrate                       |
| Chromosomal abnormalities           | Other hereditary immune diseases       | Oral corticosteroid           |
| Conduct disorder                    | Other metabolic disorders              | SSRI/SSNRI                    |
| Coagulation defects                 | Psychosis                              | Thiazide diuretic             |
| Congenital heart disease            | Rheumatoid arthritis                   | Thyroid                       |
| Cystic fibrosis                     | Sudden death or ventricular arrhythmia | Tricyclic antidepressant      |
| Depression / depressive disorder    | Smoking                                | Vasodilator                   |
| Diabetes mellitus                   | Stroke                                 | Warfarin                      |
| Electrocardiogram                   | Tic disorder                           | Xanthine derivative           |
| Emphysema                           | Valvular heart disease                 |                               |

<sup>a</sup> ACE=angiotensin-converting enzyme; COPD=chronic obstructive pulmonary disease; COX=cyclooxygenase; NSAID=nonsteroidal anti-inflammatory agent; SSRI/SSNRI=selective serotonin reuptake inhibitor or selective serotonin-norepinephrine reuptake inhibitor.

\* Data available in Medicaid/Medicare database only.
